# Supplementary material for: Synthesis and cation-exchange properties of a bis-zwitterionic lamellar hybrid material
Source: Royal Society of Chemistry journal article supplement (doi:10.1039/b719635k), 2008-01-01

## Synthesis and Cation-Exchange Properties of a bis-Zwitterionic lamellar Hybrid Material

Eric Besson,<sup>a</sup> Ahmad Mehdi,<sup>\*b</sup> Hervé Chollet,<sup>c</sup> Catherine Réyé,<sup>b</sup> Roger Guillard<sup>d</sup> and Robert J.P. Corriu<sup>b</sup>

ESI

<sup>29</sup>Si CP-MAS NMR spectrum of the sample **XI**<sup>N,N</sup>

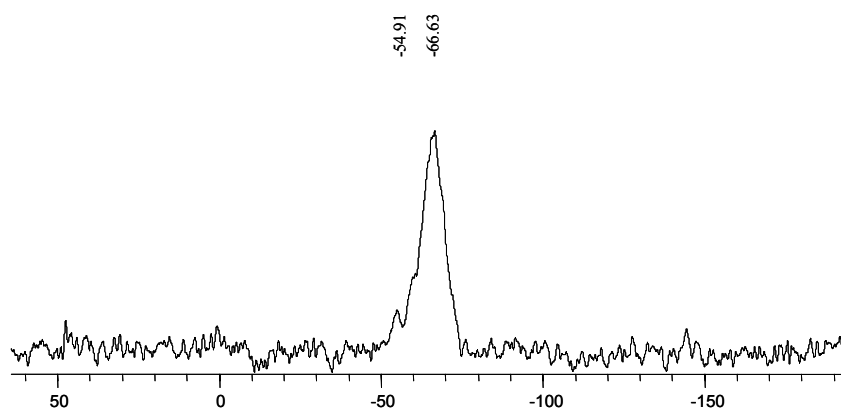

Supplement: b719635k.pdf [file b719635k.pdf]
